# Supplementary material
Source: Royal Society of Chemistry journal article supplement (doi:10.1039/d5tb02797g)

## Indole–Bipyridyl Fluorophores as Dual-Functional Probes for Endoplasmic Reticulum Imaging and Zn<sup>2+</sup> Sensing in Live Cells

Mohini Ghorpade, Sayan Bera, Gayatri Bhattad, Paramasivam Mahalingam, and

Sriram Kanvah\*

Department of Chemistry, Indian Institute of Technology Gandhinagar, Palaj, Gandhinagar

382055: e-mail: sriram@iitgn.ac.in

| Table of Contents |                                                                                                                                                                                                                                                  |
|-------------------|--------------------------------------------------------------------------------------------------------------------------------------------------------------------------------------------------------------------------------------------------|
| S1                | Absorption and Emission spectra of <b>IBP-1</b> in various solvents                                                                                                                                                                              |
| S2                | Absorption and Emission spectrum of <b>IBP-3</b> in various solvents                                                                                                                                                                             |
| S3                | Emission spectrum of <b>IBP-1</b> , <b>IBP-2</b> and <b>IBP-3</b> in glycerol-methanol solution                                                                                                                                                  |
| S4                | Zn <sup>2+</sup> -induced spectral response and metal-ion selectivity of <b>IBP-1</b> , <b>IBP-2</b> and <b>IBP-3</b>                                                                                                                            |
| S5                | Emission spectra of <b>IBP-1</b> , <b>IBP-2</b> and <b>IBP 3</b> with the addition of Fe <sup>3+</sup> , Al <sup>3+</sup> , Ca <sup>2+</sup> , Sn <sup>2+</sup> , cysteine, glutathione, H <sub>2</sub> O <sub>2</sub> and Zn <sup>2+</sup> ions |
| S6                | Job's Plot for <b>IBP-2</b> with Zn <sup>2+</sup>                                                                                                                                                                                                |
| S7                | pH response toward <b>IBP-1</b> probe                                                                                                                                                                                                            |
| S8                | Optimised geometries of <b>IBP-1</b> , <b>IBP-2</b> and <b>IBP-3</b> in their syn-conformations and <b>IBP-1</b> with anti-conformation                                                                                                          |
| S9                | Cellular imaging in live COS-7 cells                                                                                                                                                                                                             |
| S10               | Cellular colocalization of <b>IBP-2</b> with MitoTrackerDeep Red tracker in COS-7 and HeLa cells                                                                                                                                                 |
| S11               | Tunicamycin-induced ER-phagy study with <b>IBP 2</b> dye                                                                                                                                                                                         |
| S12-<br>S14       | Spectral Characterisation of the Synthesised Compounds                                                                                                                                                                                           |

## Absorption and Emission Spectra

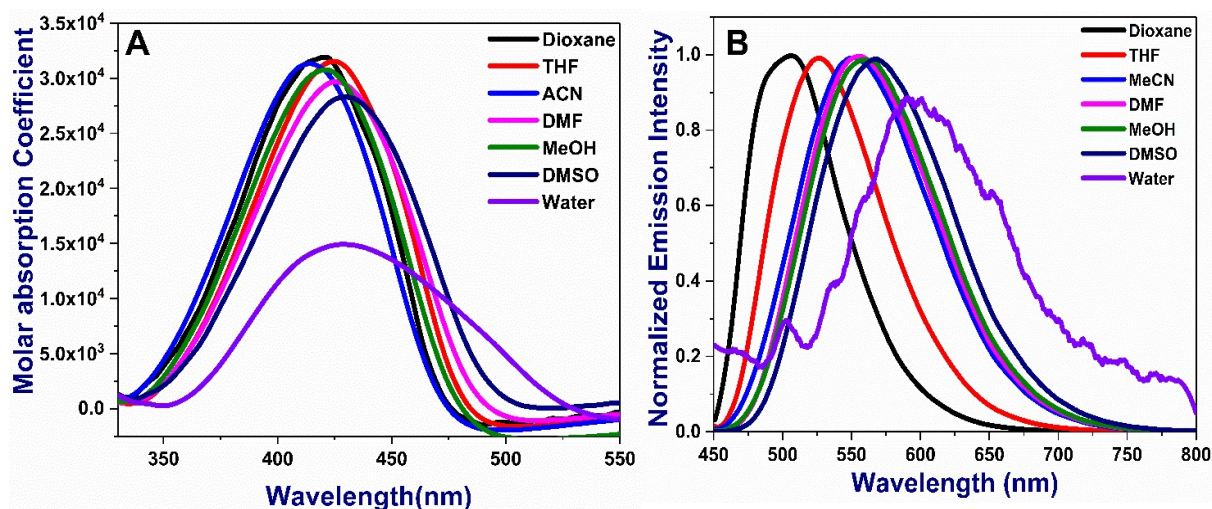

Fig S1 Absorption and Emission spectra of IBP-1 in various solvents

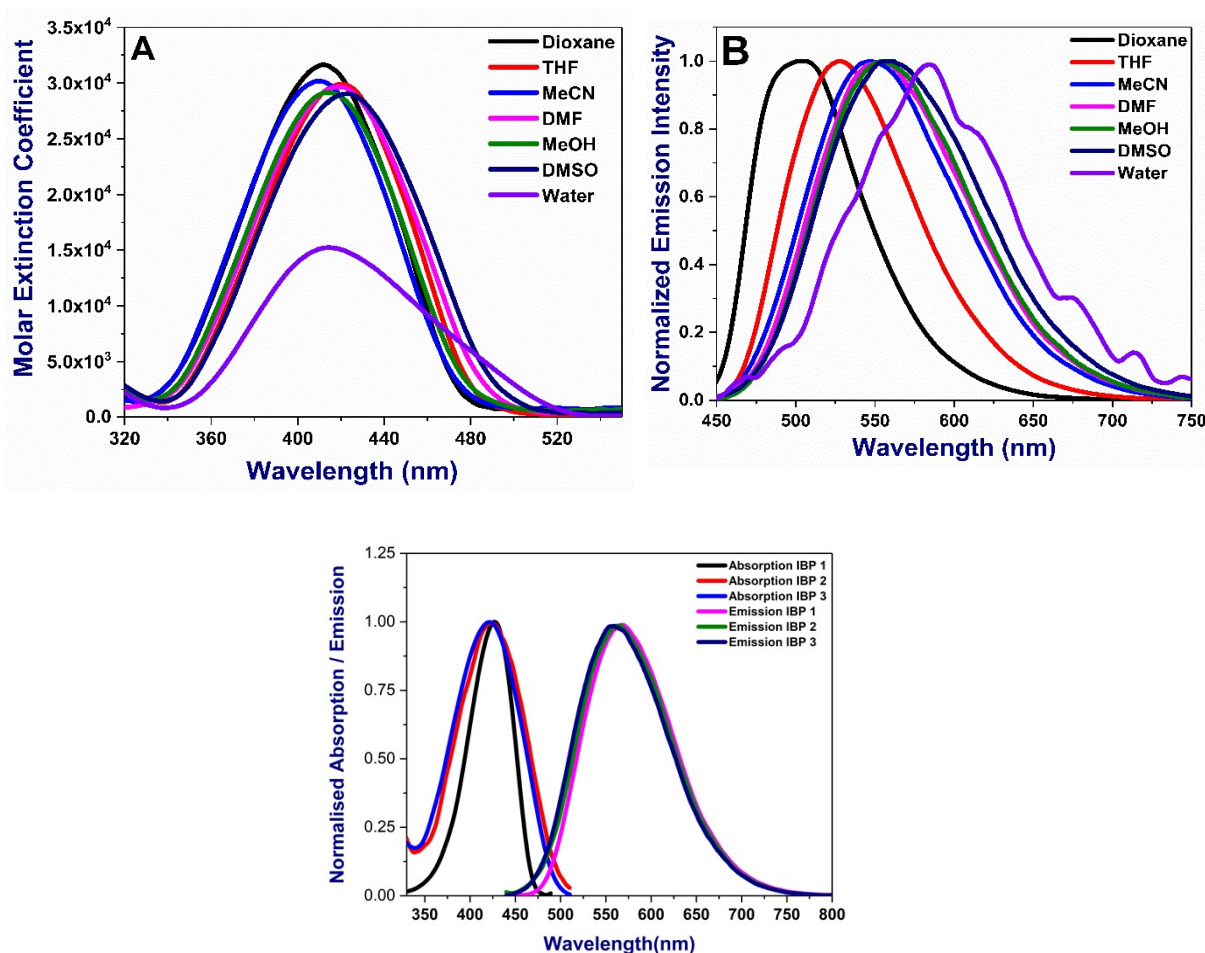

Fig S2: Absorption and Emission spectrum of IBP-3 in various solvents. The bottom figure is the combined absorption and emission spectra of all three molecules in DMSO revealing a distinct Stokes shift.

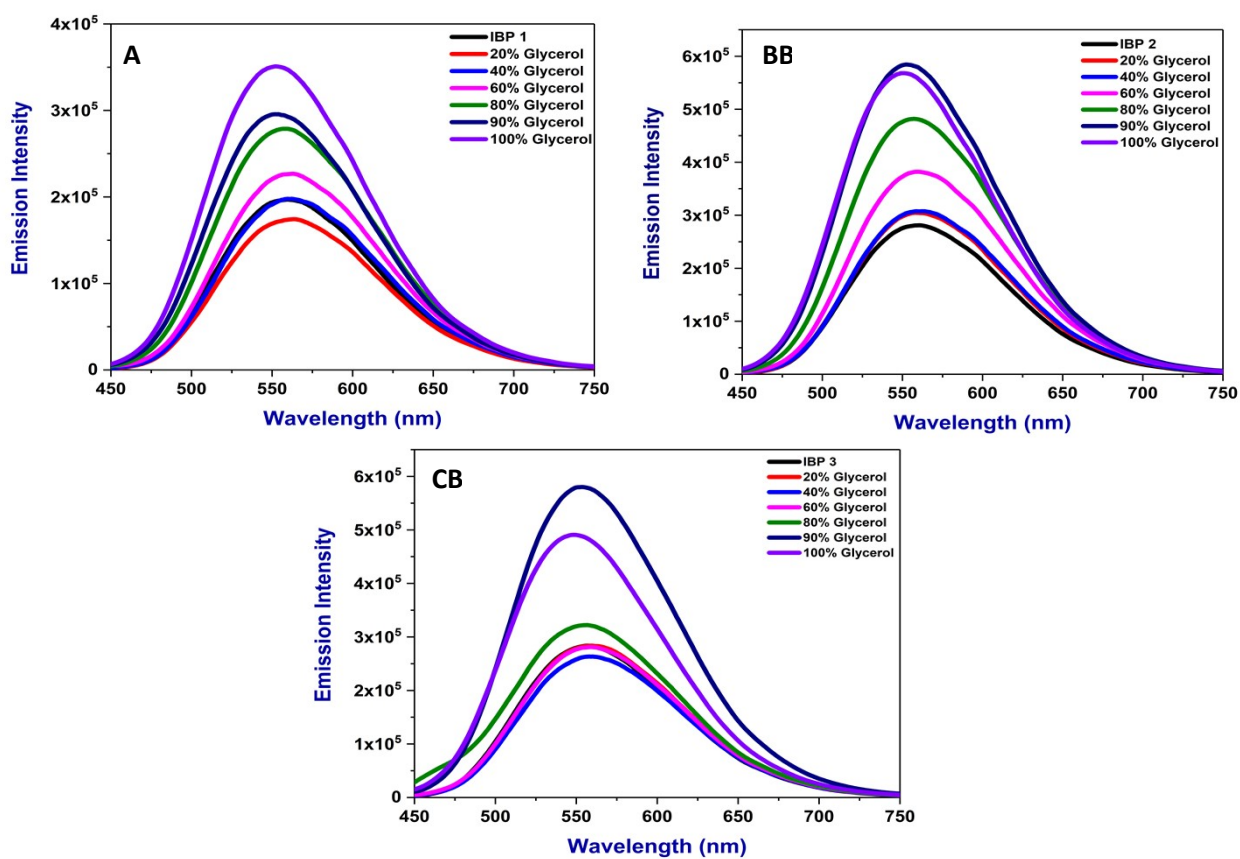

### Viscosity study

**Fig S3** Emission spectrum of (A)IBP-1, (B)IBP-2 and (C)IBP-3 in glycerol-methanol solution (Concentration:  $10 \mu\text{M}$ ).

### Zn<sup>2+</sup>-induced spectral response of IBP-1, IBP-2 and IBP-3

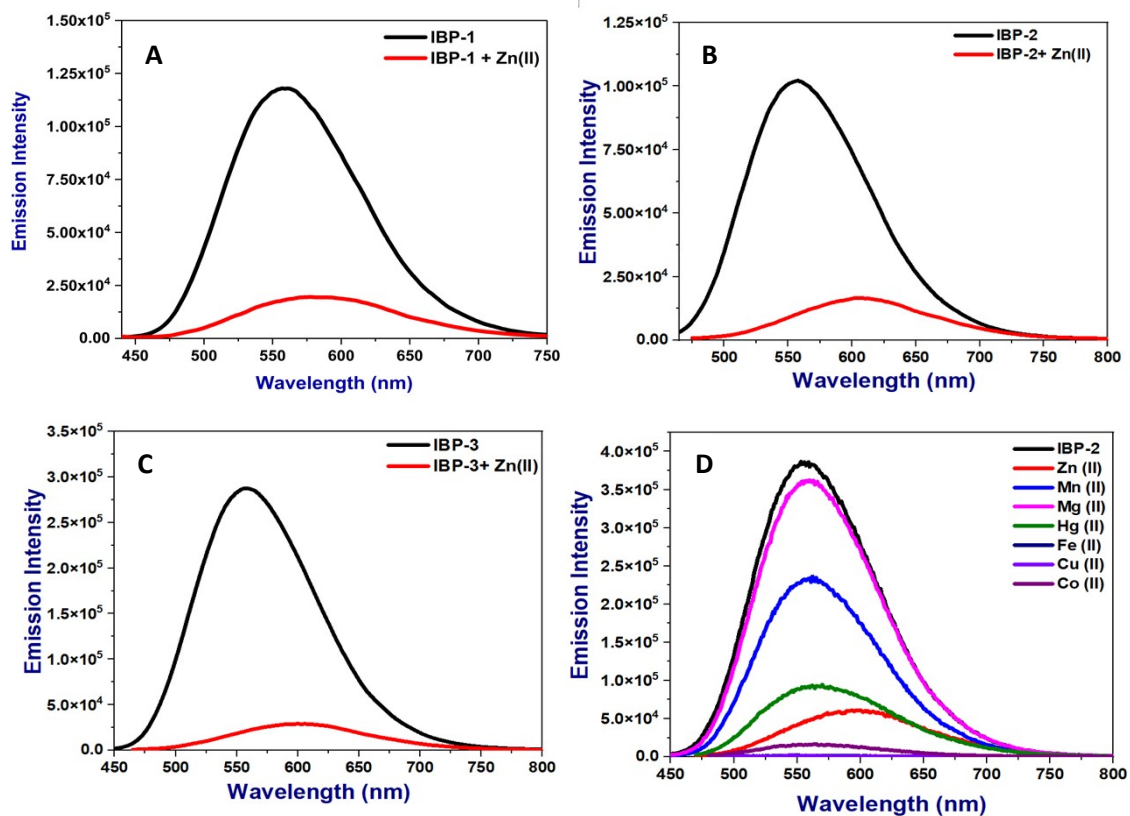

**Fig S4:** Emission spectra of (A) **IBP-1**, (B) **IBP-2** & (C) **IBP-3** with the addition of Zinc (II) and the selectivity of (D) **IBP-2** with the addition of different metal ions. Only **Zn<sup>2+</sup>** addition yields a bathochromic shift

### Ion, RSS and ROS selectivity test

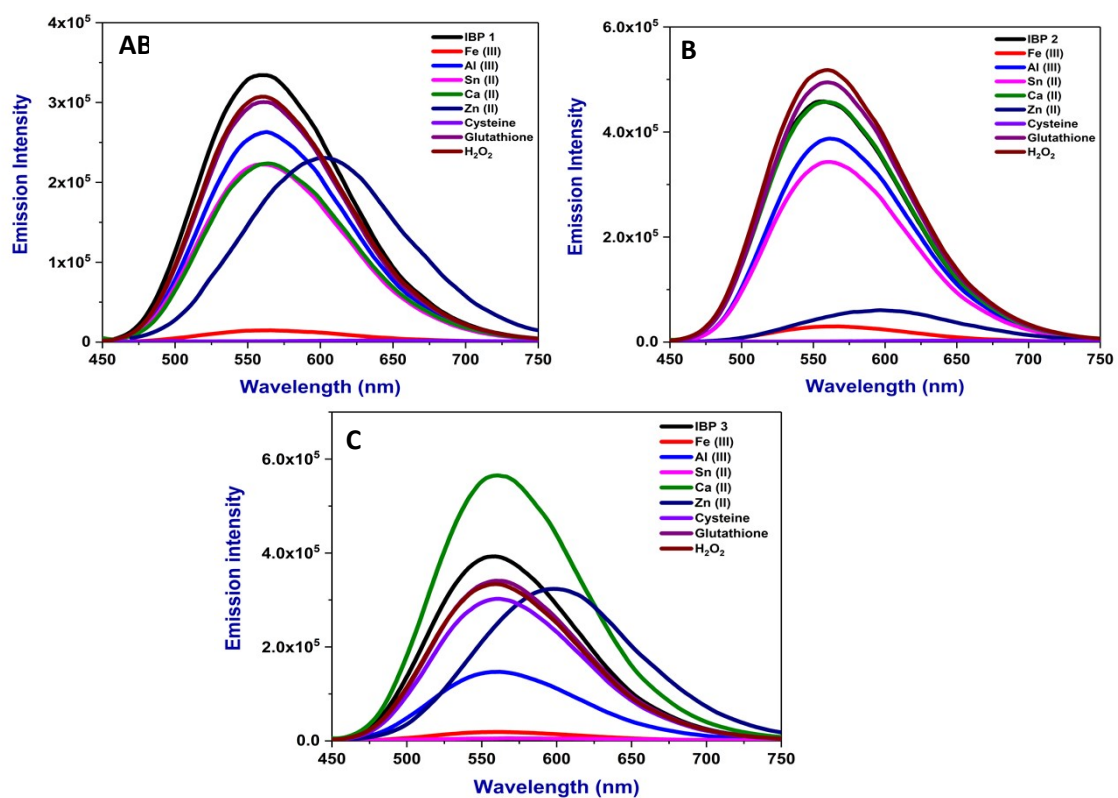

**Fig S5.** Emission spectra of **IBP-1**, **IBP-2** and **IBP-3** with the addition of  $\text{Fe}^{3+}$ ,  $\text{Al}^{3+}$ ,  $\text{Sn}^{2+}$ ,  $\text{Ca}^{2+}$  cysteine, glutathione,  $\text{H}_2\text{O}_2$  and  $\text{Zn}^{2+}$  ions

| Dye (mL) | Zn <sup>2+</sup> (mL) | Total (mL) | Mole fraction of Probe (X <sub>Dye</sub> ) | Mole fraction of Zn (X <sub>Zn</sub> ) | F      | F <sub>0</sub> | ΔF      |
|----------|-----------------------|------------|--------------------------------------------|----------------------------------------|--------|----------------|---------|
| 0.0      | 2.0                   | 2.0        | 0.0                                        | 1.0                                    | 3225   | 700000         | -696775 |
| 0.2      | 1.8                   | 2.0        | 0.1                                        | 0.9                                    | 237860 | 700000         | -462140 |
| 0.6      | 1.4                   | 2.0        | 0.3                                        | 0.7                                    | 719694 | 700000         | 19694   |
| 1.0      | 1.0                   | 2.0        | 0.5                                        | 0.5                                    | 926146 | 700000         | 226146  |
| 1.4      | 0.6                   | 2.0        | 0.7                                        | 0.3                                    | 908828 | 700000         | 208828  |
| 1.8      | 0.2                   | 2.0        | 0.9                                        | 0.1                                    | 775042 | 700000         | 75042   |
| 2.0      | 0.0                   | 2.0        | 1.0                                        | 0.0                                    | 700000 | 700000         | 0       |

**Job's Plot Table (IBP2–Zn<sup>2+</sup> System)**

X-axis: Mole fraction of probe (X<sub>Dye</sub>)

Y-axis: = X<sub>Dye</sub> \* ΔF

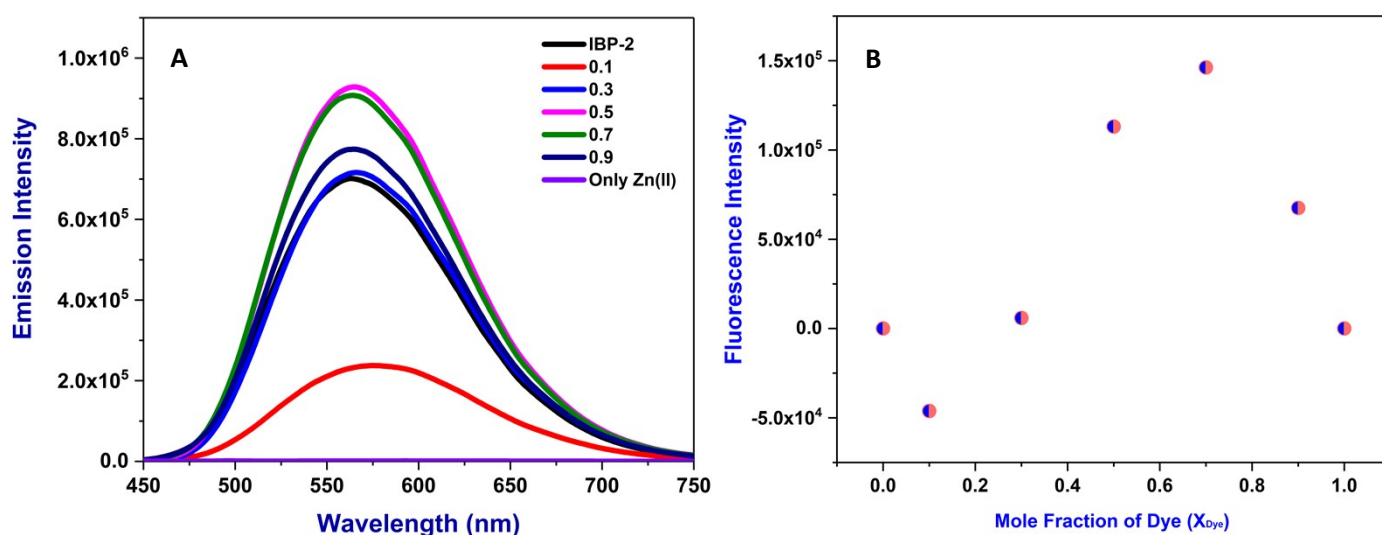

**Fig S6.** Fluorescence intensity profile of **IBP-2** at different Mole fractions (A) with Zn<sup>2+</sup> from which Jobs plot is derived. Job's plot (B) of **IBP-Zn<sup>2+</sup>** complex at 430 nm.

pH response toward IBP-1 probe

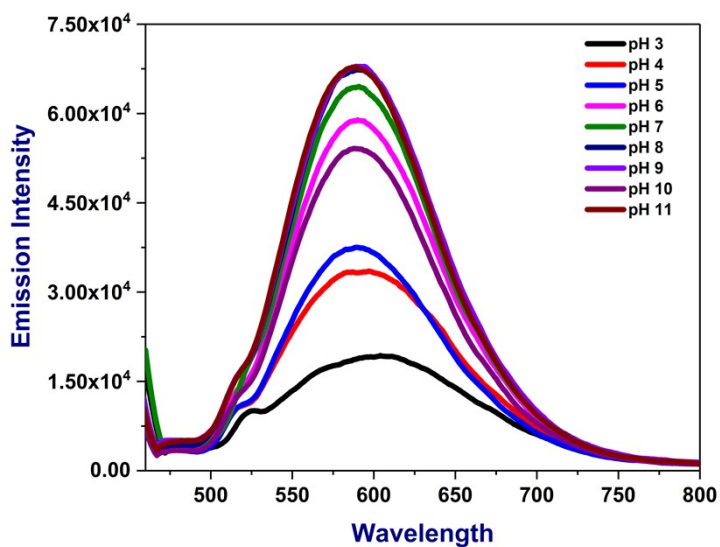

Fig S7. Emission spectra of IBP-1 at different pH

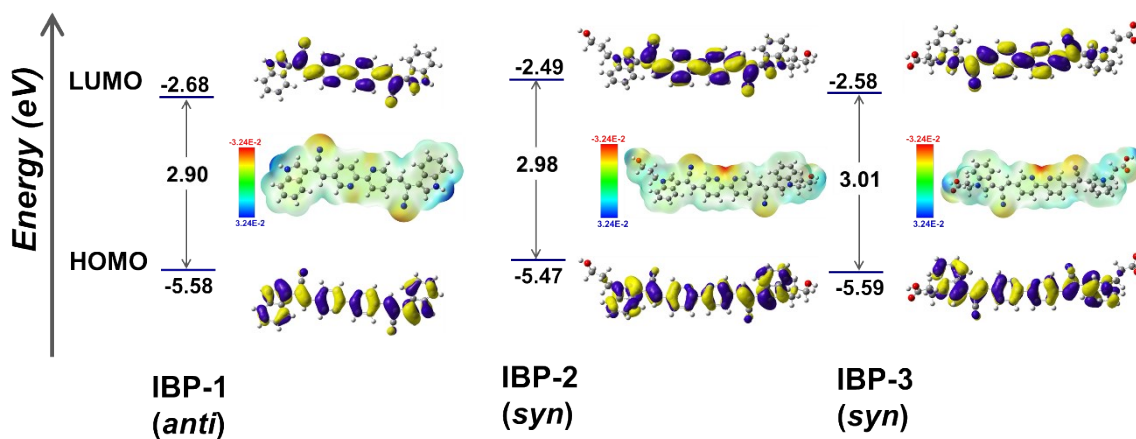

Fig S8. Optimized geometries of IBP-2 and IBP-3 in their *syn*-conformations and IBP-1 with *anti*-conformation, highlighting the HOMO–LUMO gap, together with isodensity surface plots of the HOMO and LUMO and the corresponding molecular electrostatic potential (ESP) surfaces.

## Live cell imaging

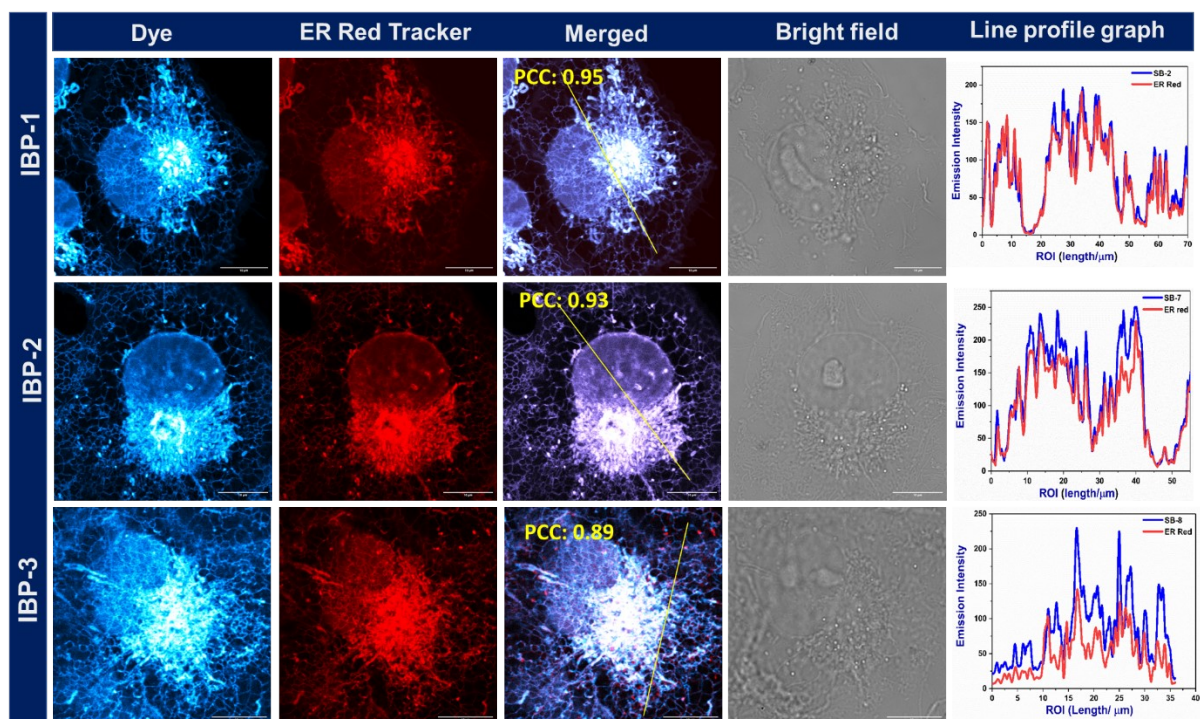

**Fig S9.** Cellular imaging and colocalization in live **COS-7** cells. Cells are stained with the synthesized molecules ( $1.5 \mu\text{M}$ ,  $\lambda_{\text{ex}}$  :405 nm,  $\lambda_{\text{em}}$  : 480-548 nm) for 10 min at 37 °C; **ER tracker Red** (50 nM,  $\lambda_{\text{ex}}$  :561 nm,  $\lambda_{\text{em}}$  :600-645 nm) for 45 min at 37 °C; merged image ; Bright-field image; line profile graph of respective dye;  $n = 15$  cells, Scale bar =10  $\mu\text{m}$ .

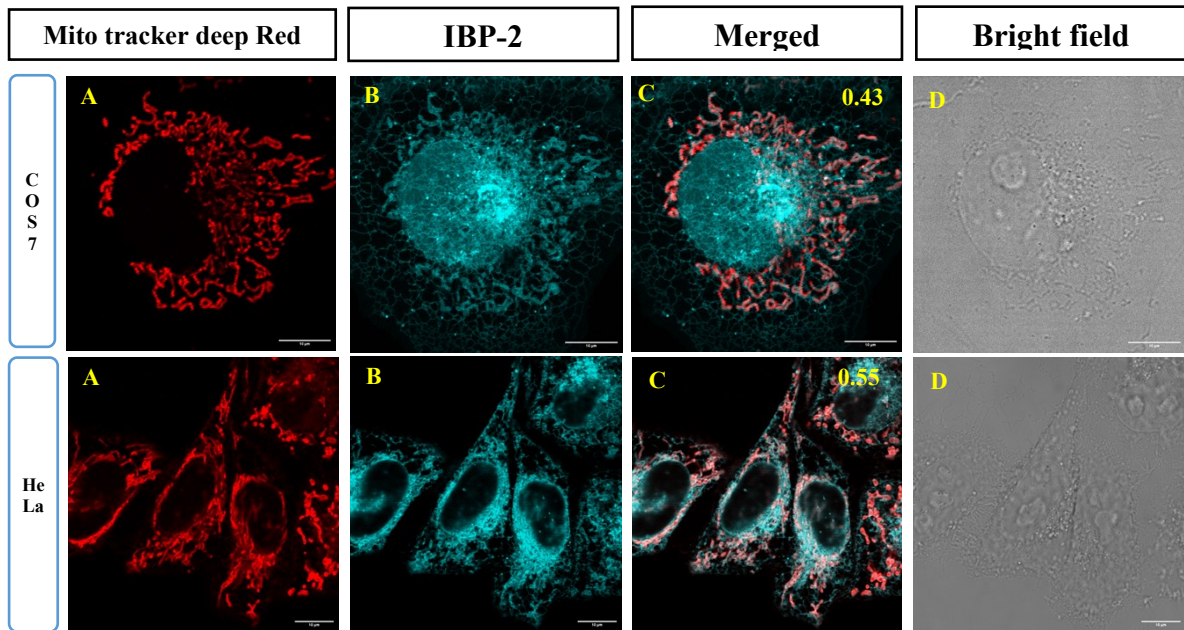

**Fig S10.** Cellular colocalization of IBP-2 with subcellular organelle tracker in COS-7 and HeLa with CLSM image of MitoTrackerDeep Red (A) IBP-2(B) Merged image (C) Brightfield (D). IBP-2: 1.5  $\mu$ M,  $\lambda_{ex}$  :405 nm,  $\lambda_{em}$ : 480-548 nm. Mitrotracker Deep Red  $\lambda_{ex}$ : 633 nm,  $\lambda_{em}$ : 645–750 nm. Quantification was performed on n = 15 cells.

## Tunicamycin-induced ER-phagy study with IBP 2 dye

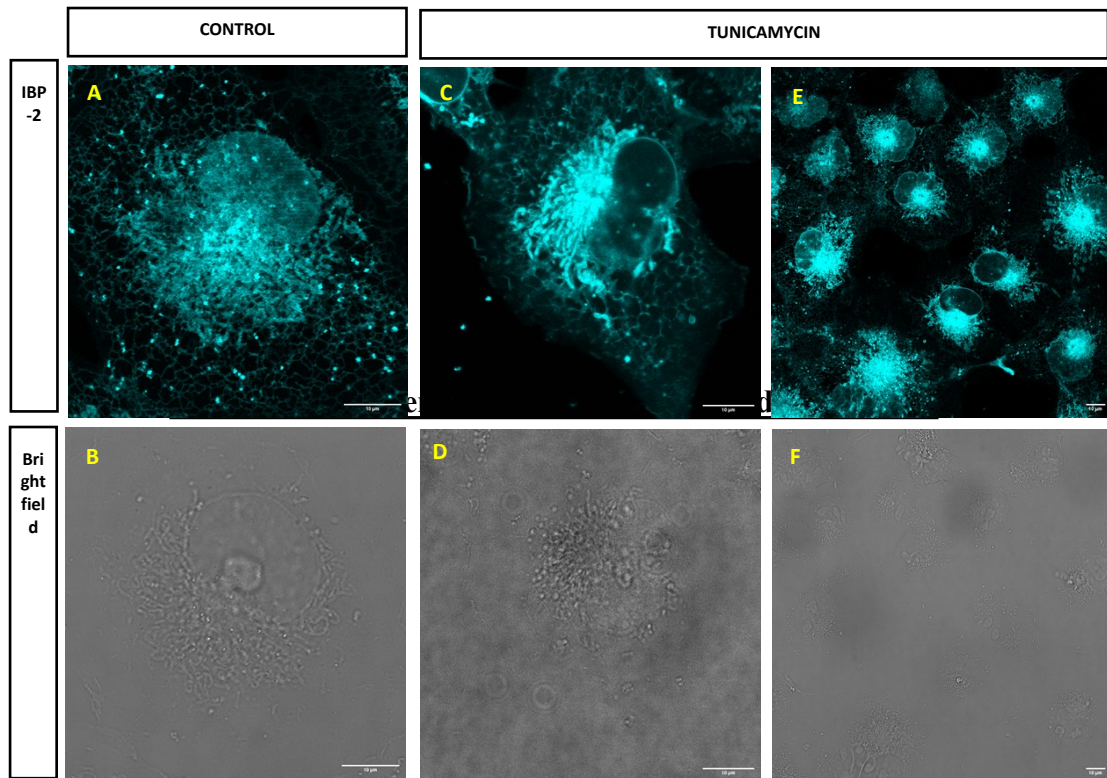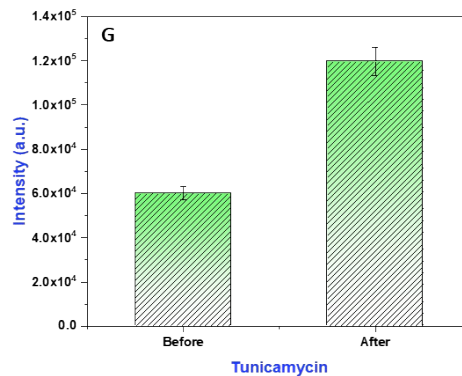

**Fig S11** CLSM images of IBP-2 without (A) and with (C, E) Tunicamycin treatment. The lower panel (B, D, and F) displays the corresponding merged bright-field images. (1.5 μM,  $\lambda_{\text{ex}}$ : 405 nm,  $\lambda_{\text{em}}$ : 480-548 nm) Scale bar: 10 μm. Quantification was performed on n = 13 cells. The intensity changes are shown in Figure (G).

**Fig S12 :  $^1\text{H}$  and  $^{13}\text{C}$  NMR & Mass of IBP-1**

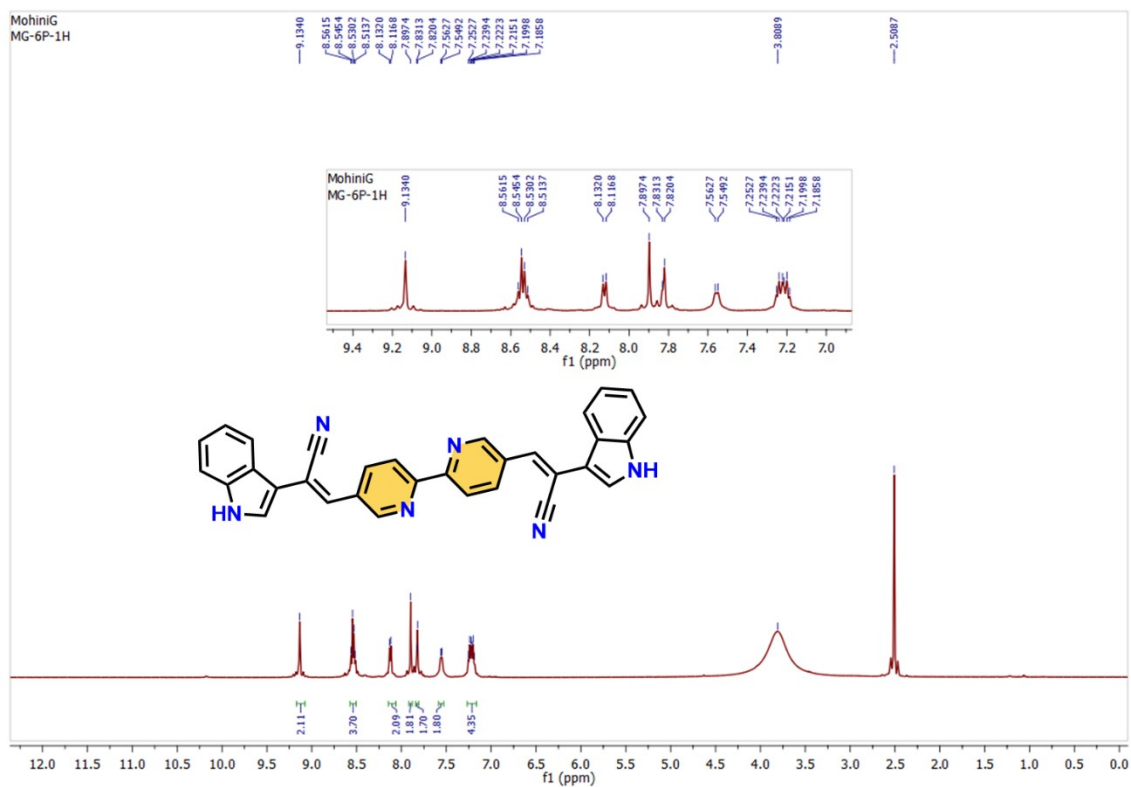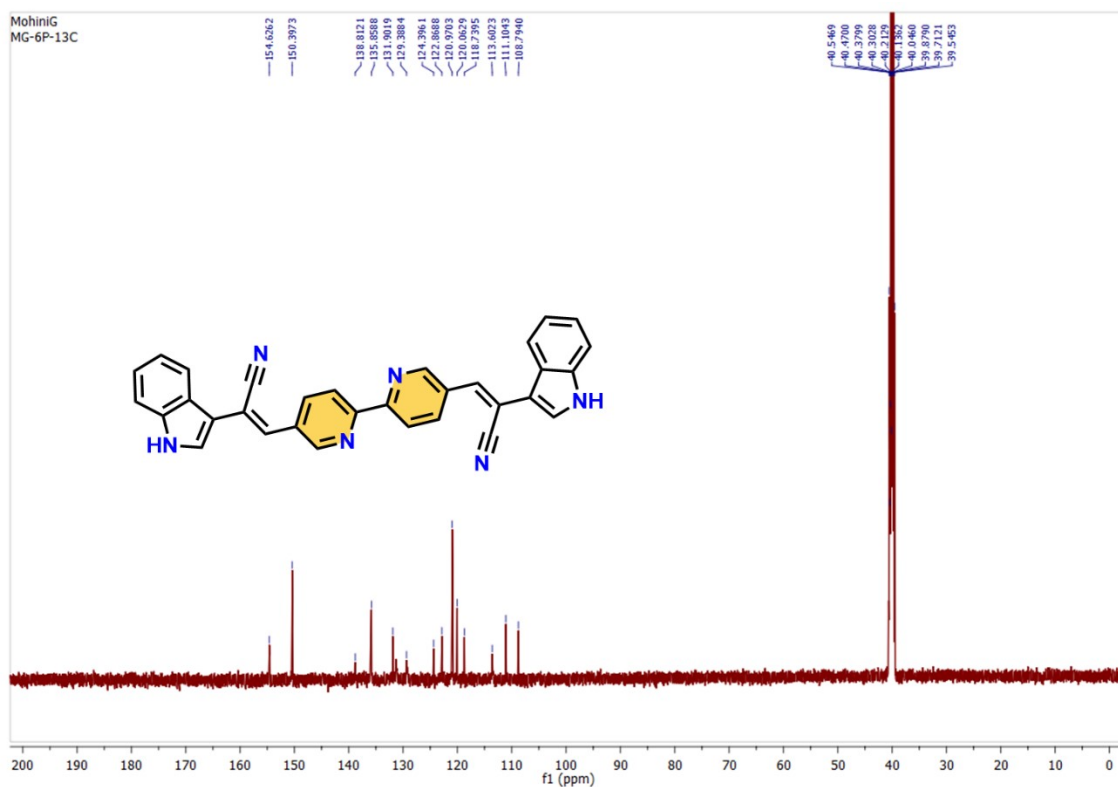

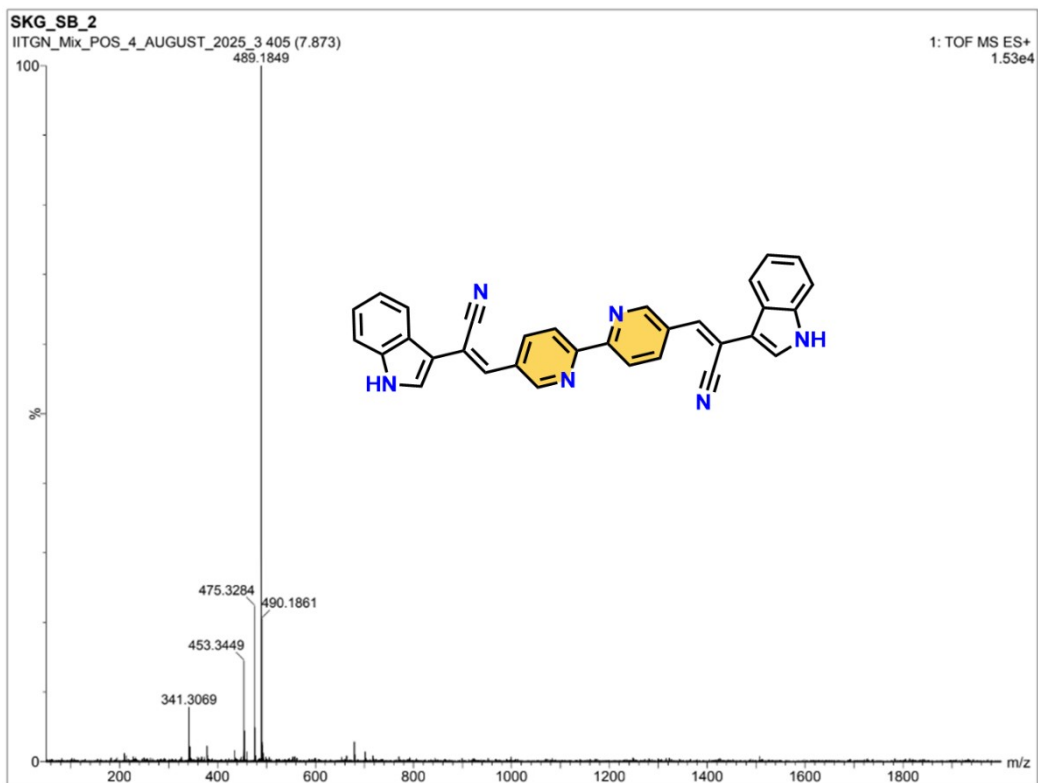

Fig S13:  $^1\text{H}$  and  $^{13}\text{C}$  NMR & Mass of IBP-2

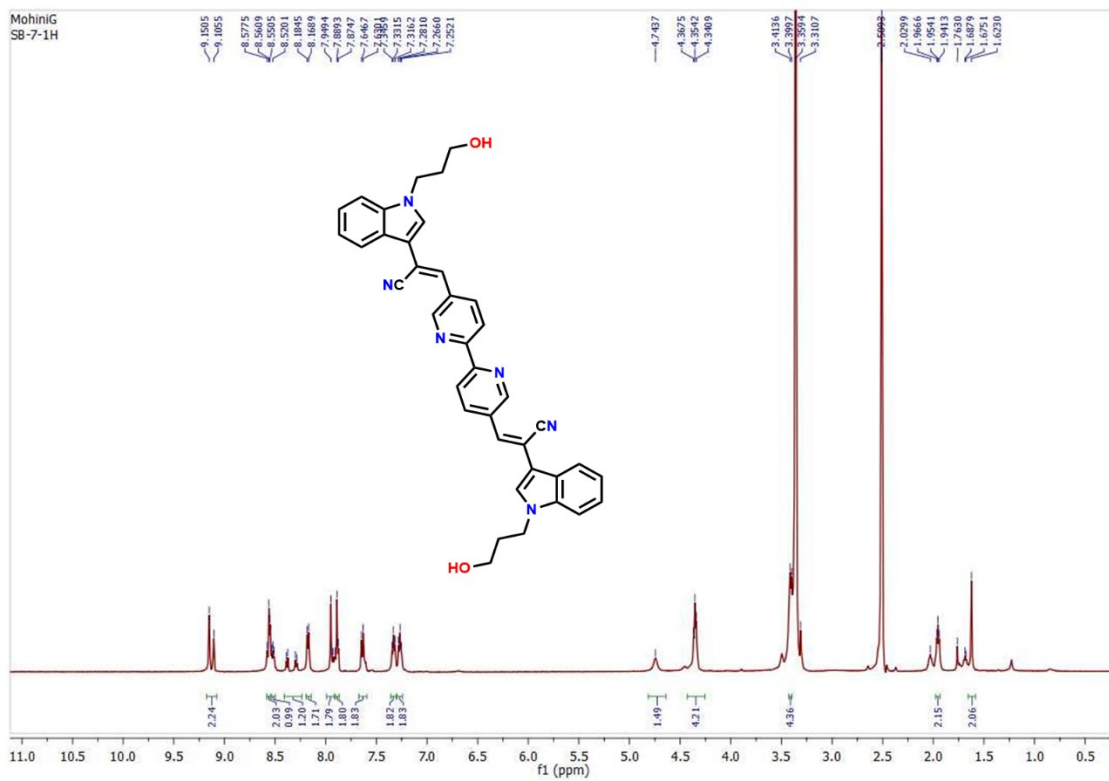

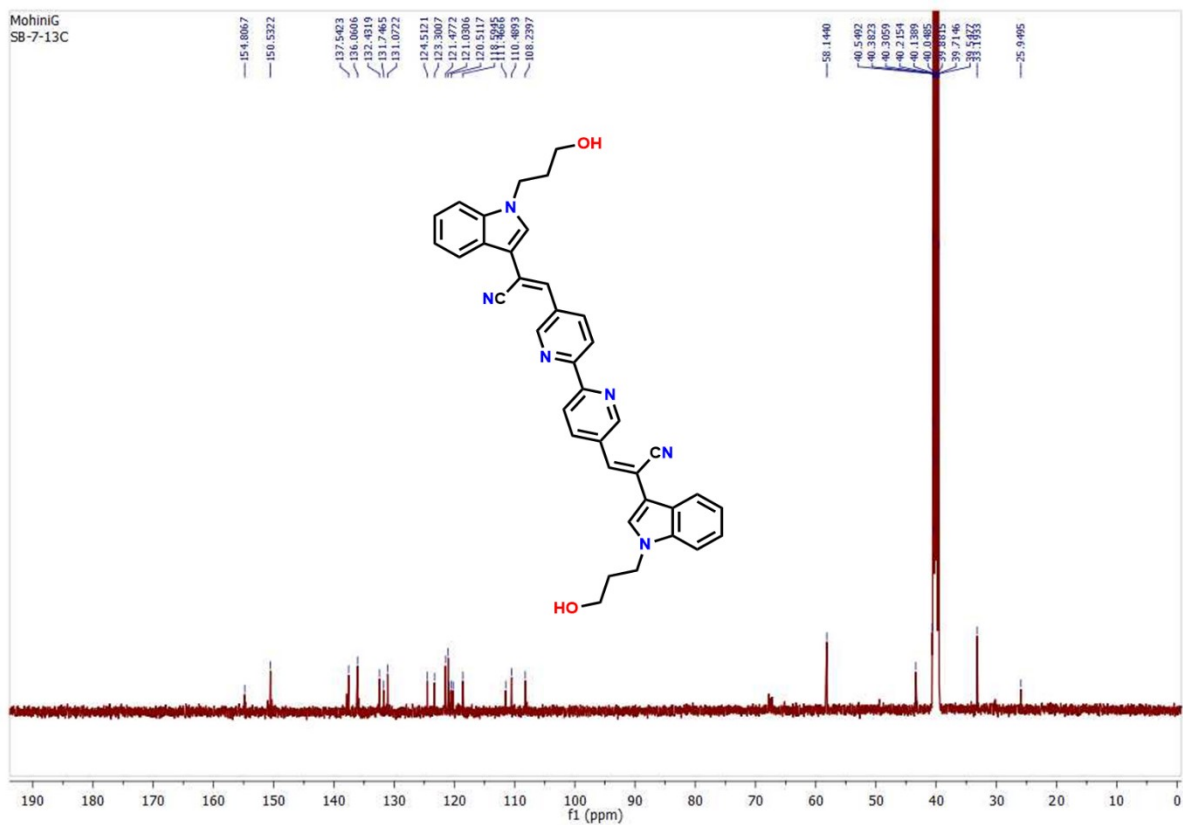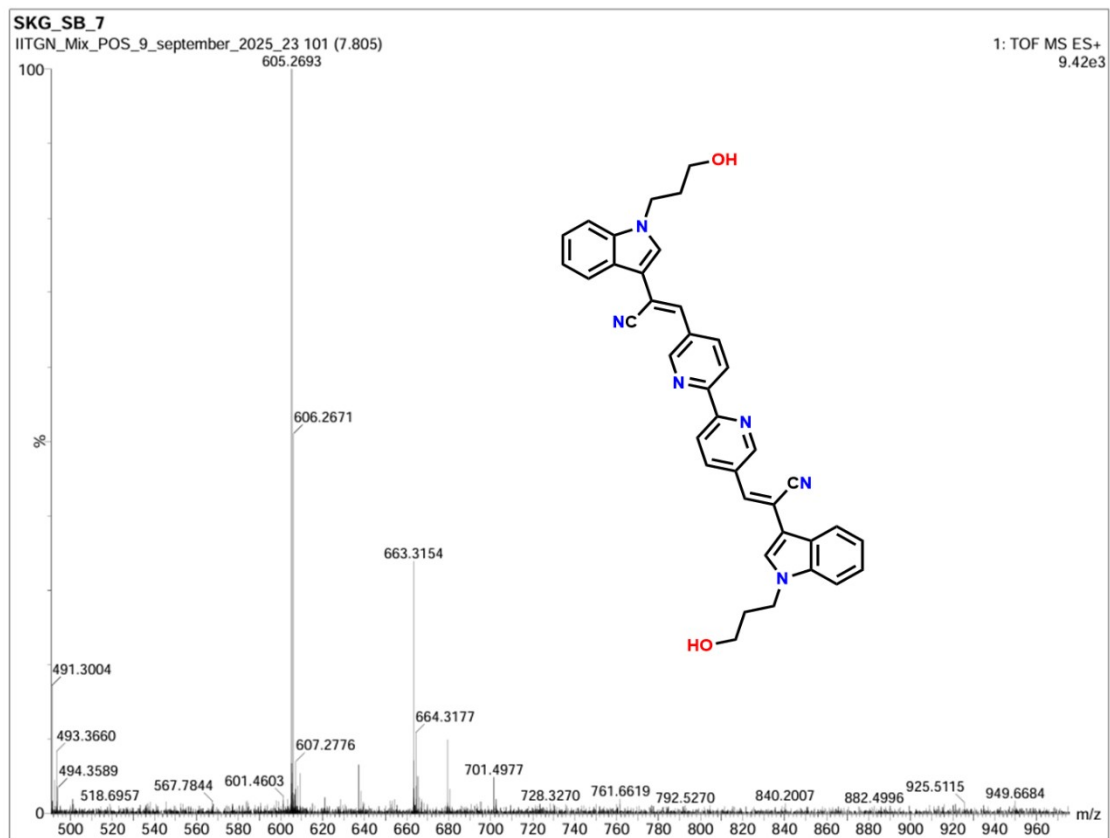



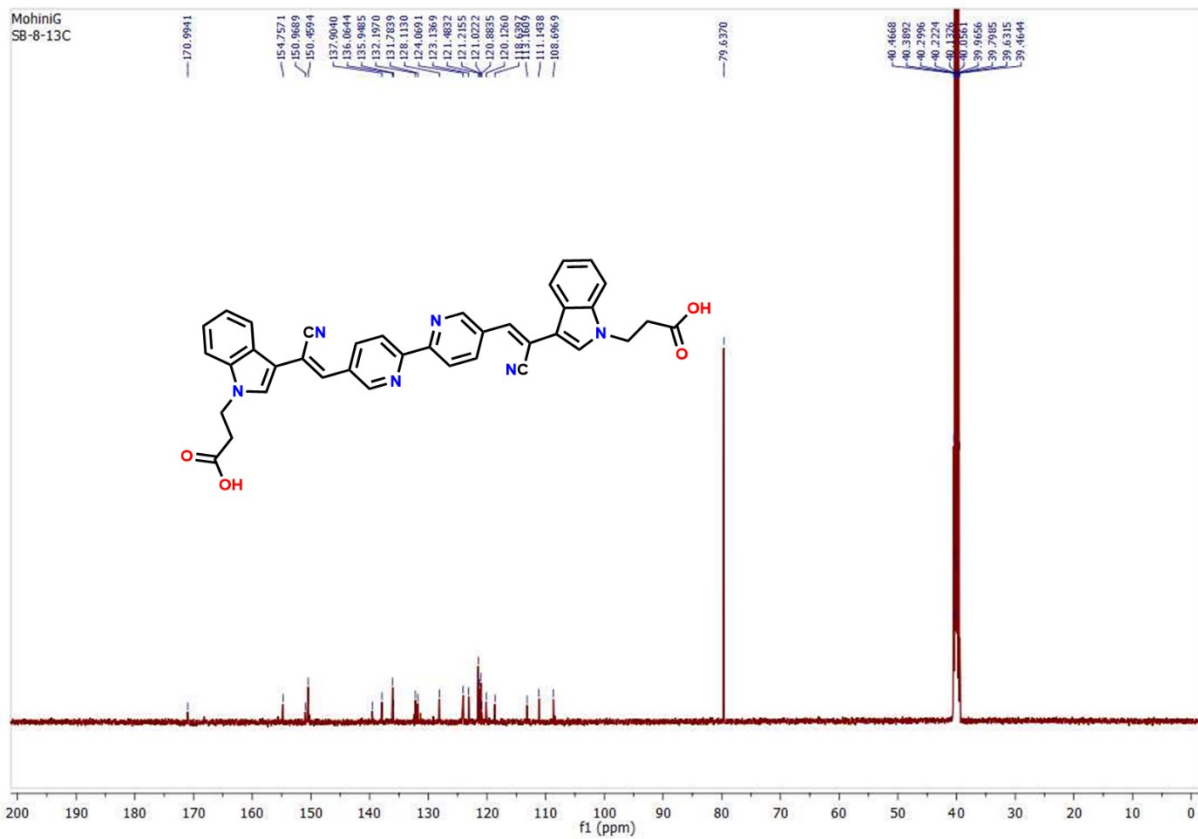

SKG\_SB8  
IITGN\_Mix\_POS\_14\_SEPTMBER\_2025\_88 59 (4.550)

1: TOF MS ES+  
4.44e4

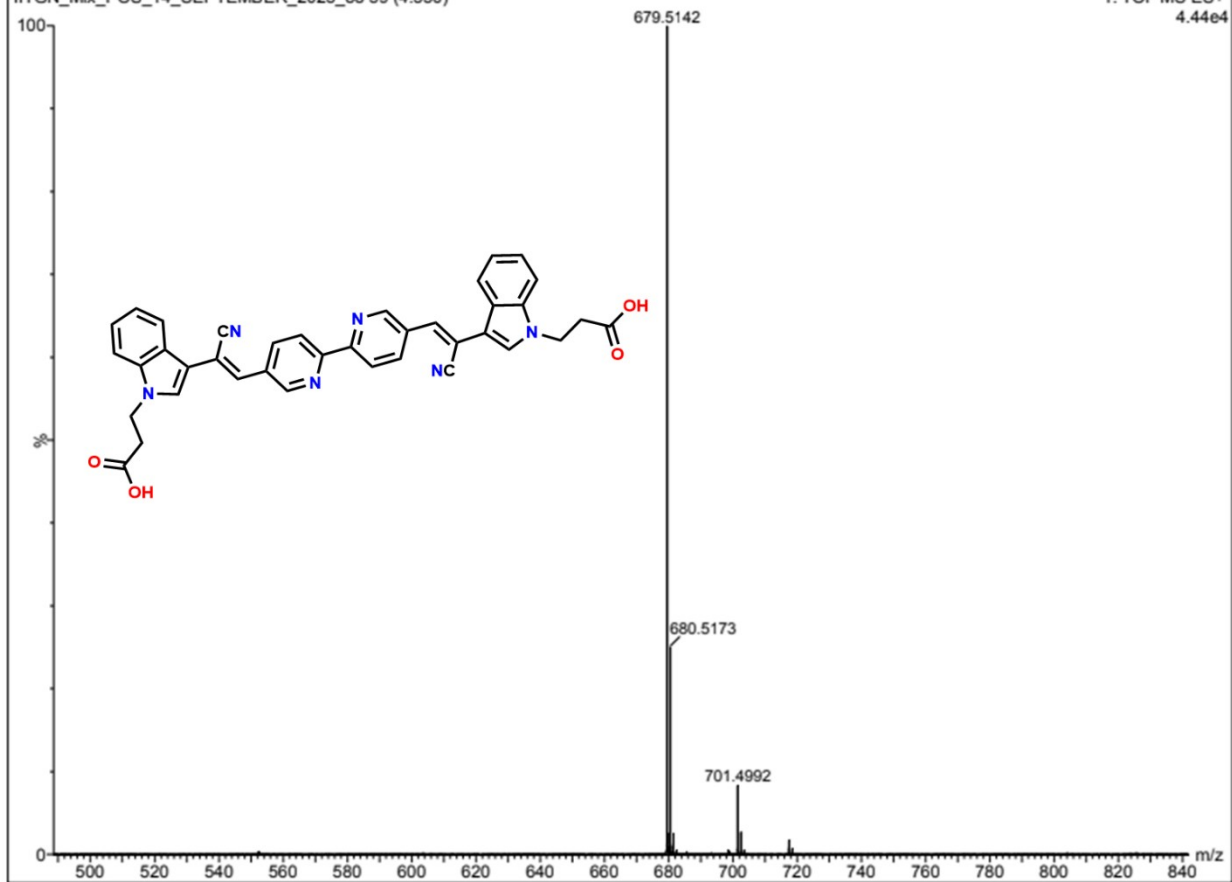

Supplement: d5tb02797g1.pdf [file d5tb02797g1.pdf]
